# Supplementary material
Source: publisher figshare collection journal article supplement (https://acs.figshare.com/ndownloader/files/4301341)
Supplement: Supplementary file 1 [file 4301341]

 
data_a
 
_audit_creation_method            SHELXL-97 
_chemical_name_systematic 
; 
 ? 
; 
_chemical_name_common             ? 
_chemical_melting_point           ? 
_chemical_formula_moiety          'C28 H36 O8, H2 O' 
_chemical_formula_sum 
 'C28 H38 O9' 
_chemical_formula_weight          518.58 
_chemical_absolute_configuration    unk
  
loop_ 
 _atom_type_symbol 
 _atom_type_description 
 _atom_type_scat_dispersion_real 
 _atom_type_scat_dispersion_imag 
 _atom_type_scat_source 
 'C'  'C'   0.0033   0.0016 
 'International Tables Vol C Tables 4.2.6.8 and 6.1.1.4' 
 'H'  'H'   0.0000   0.0000 
 'International Tables Vol C Tables 4.2.6.8 and 6.1.1.4' 
 'O'  'O'   0.0106   0.0060 
 'International Tables Vol C Tables 4.2.6.8 and 6.1.1.4' 
 
_symmetry_cell_setting           'orthorhombic' 
_symmetry_space_group_name_H-M    'P 21 21 21' 
_symmetry_space_group_name_Hall   'P 2ac 2ab'
 
loop_ 
 _symmetry_equiv_pos_as_xyz 
 'x, y, z' 
 '-x+1/2, -y, z+1/2' 
 'x+1/2, -y+1/2, -z' 
 '-x, y+1/2, -z+1/2' 
 
_cell_length_a                    9.393(1) 
_cell_length_b                    14.905(1) 
_cell_length_c                    19.192(1) 
_cell_angle_alpha                 90.00 
_cell_angle_beta                  90.00 
_cell_angle_gamma                 90.00 
_cell_volume                      2686.9(4) 
_cell_formula_units_Z             4 
_cell_measurement_temperature     295(2) 
_cell_measurement_reflns_used     2755 
_cell_measurement_theta_min       2.12 
_cell_measurement_theta_max       25.44
 
_exptl_crystal_description        plate 
_exptl_crystal_colour             colourless 
_exptl_crystal_size_max           0.50 
_exptl_crystal_size_mid           0.30 
_exptl_crystal_size_min           0.10 
_exptl_crystal_density_meas       ? 
_exptl_crystal_density_diffrn     1.282 
_exptl_crystal_density_method     'not measured' 
_exptl_crystal_F_000              1112 
_exptl_absorpt_coefficient_mu     0.095 
_exptl_absorpt_correction_type    none
_exptl_absorpt_correction_T_min   ? 
_exptl_absorpt_correction_T_max   ? 
_exptl_absorpt_process_details    ? 
 
_exptl_special_details 
; 
 ? 
; 
 
_diffrn_ambient_temperature       295(2) 
_diffrn_radiation_wavelength      0.71073 
_diffrn_radiation_type            MoK\a 
_diffrn_radiation_source          'fine-focus sealed tube' 
_diffrn_radiation_monochromator   graphite 
_diffrn_measurement_device_type   'MAC DIP 2030K '
_diffrn_measurement_method             \w
_diffrn_detector_area_resol_mean  ? 
_diffrn_standards_number          ? 
_diffrn_standards_interval_count  ? 
_diffrn_standards_interval_time   ? 
_diffrn_standards_decay_%         ? 
_diffrn_reflns_number             2755 
_diffrn_reflns_av_R_equivalents   0.0000 
_diffrn_reflns_av_sigmaI/netI     0.0169 
_diffrn_reflns_limit_h_min        0 
_diffrn_reflns_limit_h_max        11 
_diffrn_reflns_limit_k_min        0 
_diffrn_reflns_limit_k_max        18 
_diffrn_reflns_limit_l_min        0 
_diffrn_reflns_limit_l_max        23 
_diffrn_reflns_theta_min          2.12 
_diffrn_reflns_theta_max          25.44 
_reflns_number_total              2755 
_reflns_number_gt                 2619 
_reflns_threshold_expression      >2sigma(I) 
 
_computing_data_collection        'DENZO(Otwinowski & Minor,1996)' 
_computing_cell_refinement        'SCALE(Otwinowski & Minor,1996)' 
_computing_data_reduction         'SCALE(Otwinowski & Minor,1996)'  
_computing_structure_solution     'SHELXS-97 (Sheldrick, 1990)' 
_computing_structure_refinement   'SHELXL-97 (Sheldrick, 1997)' 
_computing_molecular_graphics     'ORTEPII(Johnson,1976) and PLUTON(Spek,1990)' 
_computing_publication_material    'SHELXL97(Sheldrick, 1997)'
 

 
_refine_special_details 
; 
 Refinement of F^2^ against ALL reflections.  The weighted R-factor wR and 
 goodness of fit S are based on F^2^, conventional R-factors R are based 
 on F, with F set to zero for negative F^2^. The threshold expression of 
 F^2^ > 2sigma(F^2^) is used only for calculating R-factors(gt) etc. and is 
 not relevant to the choice of reflections for refinement.  R-factors based 
 on F^2^ are statistically about twice as large as those based on F, and R- 
 factors based on ALL data will be even larger. 
; 
 
_refine_ls_structure_factor_coef  Fsqd  
_refine_ls_matrix_type            full 
_refine_ls_weighting_scheme       calc  
_refine_ls_weighting_details 
 'calc w=1/[\s^2^(Fo^2^)+(0.0873P)^2^+0.6333P] where P=(Fo^2^+2Fc^2^)/3' 
_atom_sites_solution_primary      direct 
_atom_sites_solution_secondary    difmap 
_atom_sites_solution_hydrogens    geom 
_refine_ls_hydrogen_treatment     mixed 
_refine_ls_extinction_method      SHELXL 
_refine_ls_extinction_coef        0.0158(19) 
_refine_ls_extinction_expression 
 'Fc^*^=kFc[1+0.001xFc^2^\l^3^/sin(2\q)]^-1/4^' 
_refine_ls_number_reflns          2755 
_refine_ls_number_parameters      335 
_refine_ls_number_restraints      0 
_refine_ls_R_factor_all           0.0484 
_refine_ls_R_factor_gt            0.0463 
_refine_ls_wR_factor_ref          0.1264 
_refine_ls_wR_factor_gt           0.1237 
_refine_ls_goodness_of_fit_ref    1.041 
_refine_ls_restrained_S_all       1.040 
_refine_ls_shift/su_max           0.000
_refine_ls_shift/su_mean          0.000 
 
 
loop_ 
 _atom_site_label 
 _atom_site_type_symbol 
 _atom_site_fract_x 
 _atom_site_fract_y 
 _atom_site_fract_z 
 _atom_site_U_iso_or_equiv 
 _atom_site_adp_type 
 _atom_site_occupancy 
 _atom_site_symmetry_multiplicity 
 _atom_site_calc_flag 
 _atom_site_refinement_flags 
 _atom_site_disorder_assembly 
 _atom_site_disorder_group 
O1 O 0.3707(2) 0.39735(15) 1.01877(11) 0.0463(5) Uani 1 1 d . . . 
O2 O -0.1707(2) 0.55047(15) 0.73986(10) 0.0450(5) Uani 1 1 d . . . 
HO2 H -0.1442 0.5504 0.6992 0.068 Uiso 1 1 calc R . . 
O3 O 0.0983(2) 0.40506(14) 0.82530(11) 0.0443(5) Uani 1 1 d . . . 
O4 O 0.0074(2) 0.60611(17) 0.96546(13) 0.0547(6) Uani 1 1 d . . . 
O5 O 0.1912(2) 0.71676(14) 0.91161(11) 0.0474(5) Uani 1 1 d . . . 
HO5 H 0.1043 0.7119 0.9112 0.071 Uiso 1 1 calc R . . 
O6 O 0.5083(3) 0.39593(16) 0.76968(12) 0.0563(6) Uani 1 1 d . . . 
O7 O 0.6182(3) 0.44513(15) 1.09791(10) 0.0490(5) Uani 1 1 d . . . 
HO7 H 0.6641 0.4865 1.0810 0.073 Uiso 1 1 calc R . . 
O8 O 0.5893(2) 0.58599(15) 0.81092(11) 0.0450(5) Uani 1 1 d . . . 
HO8 H 0.6541 0.5703 0.7850 0.068 Uiso 1 1 calc R . . 
OW O 0.7784(4) 0.5922(2) 1.06385(19) 0.0868(10) Uani 1 1 d D . . 
C1 C 0.1310(3) 0.5780(2) 0.96909(15) 0.0441(7) Uani 1 1 d . . . 
C2 C 0.1738(3) 0.4954(2) 1.00080(16) 0.0476(7) Uani 1 1 d . . . 
H2 H 0.1137 0.4643 1.0308 0.057 Uiso 1 1 calc R . . 
C3 C 0.3044(3) 0.46472(19) 0.98535(15) 0.0399(6) Uani 1 1 d . . . 
C4 C 0.5168(3) 0.3864(2) 0.99118(14) 0.0383(6) Uani 1 1 d . . . 
H4 H 0.5184 0.3341 0.9602 0.046 Uiso 1 1 calc R . . 
C5 C 0.5416(3) 0.4701(2) 0.94787(14) 0.0385(6) Uani 1 1 d . . . 
H5A H 0.6024 0.4574 0.9082 0.046 Uiso 1 1 calc R . . 
H5B H 0.5845 0.5173 0.9756 0.046 Uiso 1 1 calc R . . 
C6 C 0.3909(3) 0.49634(18) 0.92418(13) 0.0348(6) Uani 1 1 d . . . 
C7 C 0.3687(3) 0.59681(18) 0.90350(14) 0.0357(6) Uani 1 1 d . . . 
H7 H 0.4584 0.6285 0.9119 0.043 Uiso 1 1 calc R . . 
C8 C 0.2519(3) 0.6423(2) 0.94839(15) 0.0399(6) Uani 1 1 d . . . 
C9 C 0.3432(3) 0.43581(18) 0.86082(14) 0.0358(6) Uani 1 1 d . . . 
H9 H 0.3405 0.3721 0.8734 0.043 Uiso 1 1 calc R . . 
C10 C 0.4449(3) 0.4536(2) 0.80070(14) 0.0386(6) Uani 1 1 d . . . 
C11 C 0.4568(3) 0.5547(2) 0.78391(14) 0.0366(6) Uani 1 1 d . . . 
C12 C 0.3367(3) 0.60173(18) 0.82430(14) 0.0339(5) Uani 1 1 d . . . 
H12 H 0.3287 0.6644 0.8095 0.041 Uiso 1 1 calc R . . 
C13 C 0.1993(3) 0.55215(18) 0.80947(14) 0.0349(6) Uani 1 1 d . . . 
C14 C 0.2030(3) 0.46737(19) 0.83111(14) 0.0370(6) Uani 1 1 d . . . 
C15 C -0.0138(3) 0.4276(2) 0.77473(15) 0.0428(6) Uani 1 1 d . . . 
C16 C -0.0544(3) 0.5270(2) 0.78406(14) 0.0395(6) Uani 1 1 d . . . 
H16 H -0.0870 0.5343 0.8322 0.047 Uiso 1 1 calc R . . 
C17 C 0.0711(3) 0.5901(2) 0.77407(15) 0.0396(6) Uani 1 1 d . . . 
H17A H 0.0902 0.5977 0.7247 0.047 Uiso 1 1 calc R . . 
H17B H 0.0487 0.6485 0.7936 0.047 Uiso 1 1 calc R . . 
C18 C 0.4492(3) 0.5686(2) 0.70462(14) 0.0441(7) Uani 1 1 d . . . 
H18A H 0.5270 0.5364 0.6826 0.053 Uiso 1 1 calc R . . 
H18B H 0.3607 0.5437 0.6872 0.053 Uiso 1 1 calc R . . 
C19 C 0.4576(4) 0.6654(2) 0.68512(16) 0.0501(7) Uani 1 1 d . . . 
H19 H 0.5320 0.6990 0.7036 0.060 Uiso 1 1 calc R . . 
C20 C 0.3680(4) 0.7063(2) 0.64393(18) 0.0583(9) Uani 1 1 d . . . 
H20A H 0.2924 0.6747 0.6245 0.070 Uiso 1 1 calc R . . 
H20B H 0.3798 0.7669 0.6340 0.070 Uiso 1 1 calc R . . 
C21 C 0.3222(4) 0.6785(2) 1.01672(17) 0.0517(8) Uani 1 1 d . . . 
H21A H 0.3648 0.6285 1.0414 0.062 Uiso 1 1 calc R . . 
H21B H 0.3982 0.7195 1.0041 0.062 Uiso 1 1 calc R . . 
C22 C 0.2206(5) 0.7267(4) 1.0659(2) 0.0811(13) Uani 1 1 d . . . 
H22 H 0.2038 0.7864 1.0545 0.097 Uiso 1 1 calc R . . 
C23 C 0.1586(7) 0.7011(5) 1.1167(3) 0.116(2) Uani 1 1 d . . . 
H23A H 0.1695 0.6422 1.1317 0.139 Uiso 1 1 calc R . . 
H23B H 0.0996 0.7402 1.1411 0.139 Uiso 1 1 calc R . . 
C24 C 0.6207(3) 0.3699(2) 1.05131(14) 0.0424(6) Uani 1 1 d . . . 
C25 C 0.7698(4) 0.3574(3) 1.02098(19) 0.0562(9) Uani 1 1 d . . . 
H25A H 0.8363 0.3468 1.0581 0.084 Uiso 1 1 calc R . . 
H25B H 0.7969 0.4104 0.9959 0.084 Uiso 1 1 calc R . . 
H25C H 0.7699 0.3069 0.9899 0.084 Uiso 1 1 calc R . . 
C26 C 0.5750(5) 0.2892(2) 1.09400(19) 0.0610(9) Uani 1 1 d . . . 
H26A H 0.4813 0.2993 1.1123 0.092 Uiso 1 1 calc R . . 
H26B H 0.6407 0.2805 1.1317 0.092 Uiso 1 1 calc R . . 
H26C H 0.5742 0.2368 1.0649 0.092 Uiso 1 1 calc R . . 
C27 C -0.1367(4) 0.3671(3) 0.7936(2) 0.0609(9) Uani 1 1 d . . . 
H27A H -0.1091 0.3056 0.7873 0.091 Uiso 1 1 calc R . . 
H27B H -0.2165 0.3803 0.7641 0.091 Uiso 1 1 calc R . . 
H27C H -0.1627 0.3769 0.8414 0.091 Uiso 1 1 calc R . . 
C28 C 0.0442(4) 0.4066(2) 0.70225(18) 0.0567(8) Uani 1 1 d . . . 
H28A H 0.0674 0.3440 0.6994 0.085 Uiso 1 1 calc R . . 
H28B H 0.1282 0.4417 0.6939 0.085 Uiso 1 1 calc R . . 
H28C H -0.0265 0.4209 0.6679 0.085 Uiso 1 1 calc R . . 
HOW2 H 0.843(5) 0.598(4) 1.034(2) 0.11(2) Uiso 1 1 d D . . 
HOW1 H 0.747(7) 0.643(2) 1.075(3) 0.15(3) Uiso 1 1 d D . . 
 
loop_ 
 _atom_site_aniso_label 
 _atom_site_aniso_U_11 
 _atom_site_aniso_U_22 
 _atom_site_aniso_U_33 
 _atom_site_aniso_U_23 
 _atom_site_aniso_U_13 
 _atom_site_aniso_U_12 
O1 0.0377(11) 0.0542(12) 0.0471(11) 0.0140(10) 0.0056(9) 0.0030(9) 
O2 0.0290(9) 0.0707(14) 0.0355(9) 0.0044(9) -0.0015(8) 0.0075(9) 
O3 0.0359(10) 0.0448(10) 0.0521(11) 0.0121(9) -0.0114(9) -0.0063(9) 
O4 0.0329(11) 0.0654(15) 0.0658(14) 0.0033(11) 0.0077(10) 0.0106(10) 
O5 0.0474(12) 0.0446(11) 0.0501(11) -0.0010(9) 0.0010(10) 0.0124(9) 
O6 0.0631(14) 0.0522(13) 0.0537(13) -0.0005(10) 0.0098(12) 0.0176(12) 
O7 0.0609(13) 0.0527(12) 0.0332(9) -0.0009(9) 0.0025(9) -0.0031(11) 
O8 0.0281(10) 0.0630(13) 0.0439(11) -0.0027(10) 0.0022(8) -0.0017(9) 
OW 0.096(2) 0.0656(18) 0.099(2) -0.0035(16) 0.040(2) -0.0193(18) 
C1 0.0348(15) 0.0557(17) 0.0418(14) -0.0005(13) 0.0048(11) 0.0018(13) 
C2 0.0357(14) 0.0570(17) 0.0501(17) 0.0076(14) 0.0098(13) 0.0000(13) 
C3 0.0354(14) 0.0445(14) 0.0400(14) 0.0087(12) 0.0004(12) -0.0007(12) 
C4 0.0341(14) 0.0473(15) 0.0335(13) 0.0015(11) -0.0004(11) 0.0055(12) 
C5 0.0302(14) 0.0499(15) 0.0353(13) 0.0048(12) -0.0028(11) 0.0036(11) 
C6 0.0308(13) 0.0405(13) 0.0331(12) 0.0033(11) -0.0010(10) 0.0014(11) 
C7 0.0281(12) 0.0414(13) 0.0374(13) 0.0026(11) 0.0007(10) 0.0013(11) 
C8 0.0344(14) 0.0471(16) 0.0382(14) 0.0004(12) 0.0000(11) 0.0025(12) 
C9 0.0321(13) 0.0360(13) 0.0392(13) 0.0041(11) -0.0041(11) 0.0018(11) 
C10 0.0307(13) 0.0467(15) 0.0384(14) 0.0013(12) -0.0041(11) 0.0059(11) 
C11 0.0281(12) 0.0466(15) 0.0351(14) 0.0028(11) 0.0002(10) 0.0012(11) 
C12 0.0286(12) 0.0357(12) 0.0374(13) 0.0037(11) 0.0013(10) 0.0020(10) 
C13 0.0279(13) 0.0422(14) 0.0347(13) 0.0046(11) -0.0014(10) 0.0009(11) 
C14 0.0289(13) 0.0433(14) 0.0389(13) 0.0042(11) -0.0002(11) 0.0006(11) 
C15 0.0334(14) 0.0501(16) 0.0450(15) 0.0063(13) -0.0072(12) -0.0005(12) 
C16 0.0289(13) 0.0571(17) 0.0326(13) 0.0055(12) -0.0017(11) 0.0024(12) 
C17 0.0312(13) 0.0448(15) 0.0427(14) 0.0071(12) -0.0019(11) 0.0033(11) 
C18 0.0431(15) 0.0544(17) 0.0348(13) 0.0030(13) 0.0029(12) 0.0034(13) 
C19 0.0527(18) 0.0562(17) 0.0413(15) 0.0064(13) 0.0055(14) -0.0086(15) 
C20 0.068(2) 0.0536(18) 0.0532(18) 0.0084(15) 0.0067(17) 0.0092(17) 
C21 0.0484(17) 0.0635(19) 0.0432(15) -0.0072(14) -0.0018(14) 0.0002(15) 
C22 0.067(2) 0.120(4) 0.057(2) -0.020(2) 0.005(2) 0.009(3) 
C23 0.117(4) 0.171(6) 0.059(3) -0.006(3) 0.005(3) 0.065(5) 
C24 0.0471(16) 0.0473(15) 0.0328(13) 0.0019(12) -0.0061(12) 0.0087(13) 
C25 0.0447(18) 0.073(2) 0.0512(17) -0.0016(16) -0.0073(15) 0.0187(16) 
C26 0.075(2) 0.0539(19) 0.0541(18) 0.0156(16) -0.0123(17) 0.0022(17) 
C27 0.0411(17) 0.063(2) 0.079(2) 0.0131(18) -0.0110(17) -0.0132(15) 
C28 0.060(2) 0.0589(19) 0.0512(17) -0.0055(15) -0.0053(16) 0.0109(16) 
 
_geom_special_details 
; 
 All esds (except the esd in the dihedral angle between two l.s. planes) 
 are estimated using the full covariance matrix.  The cell esds are taken 
 into account individually in the estimation of esds in distances, angles 
 and torsion angles; correlations between esds in cell parameters are only 
 used when they are defined by crystal symmetry.  An approximate (isotropic) 
 treatment of cell esds is used for estimating esds involving l.s. planes. 
; 
 
loop_ 
 _geom_bond_atom_site_label_1 
 _geom_bond_atom_site_label_2 
 _geom_bond_distance 
 _geom_bond_site_symmetry_2 
 _geom_bond_publ_flag 
O1 C3 1.345(3) . ? 
O1 C4 1.479(3) . ? 
O2 C16 1.427(3) . ? 
O2 HO2 0.8200 . ? 
O3 C14 1.357(3) . ? 
O3 C15 1.471(3) . ? 
O4 C1 1.237(4) . ? 
O5 C8 1.433(4) . ? 
O5 HO5 0.8200 . ? 
O6 C10 1.203(4) . ? 
O7 C24 1.435(4) . ? 
O7 HO7 0.8200 . ? 
O8 C11 1.426(3) . ? 
O8 HO8 0.8200 . ? 
OW HOW2 0.84(2) . ? 
OW HOW1 0.84(2) . ? 
C1 C2 1.431(5) . ? 
C1 C8 1.539(4) . ? 
C2 C3 1.343(4) . ? 
C2 H2 0.9300 . ? 
C3 C6 1.504(4) . ? 
C4 C5 1.517(4) . ? 
C4 C24 1.531(4) . ? 
C4 H4 0.9800 . ? 
C5 C6 1.537(4) . ? 
C5 H5A 0.9700 . ? 
C5 H5B 0.9700 . ? 
C6 C7 1.563(4) . ? 
C6 C9 1.579(4) . ? 
C7 C8 1.551(4) . ? 
C7 C12 1.551(4) . ? 
C7 H7 0.9800 . ? 
C8 C21 1.564(4) . ? 
C9 C14 1.511(4) . ? 
C9 C10 1.521(4) . ? 
C9 H9 0.9800 . ? 
C10 C11 1.544(4) . ? 
C11 C18 1.537(4) . ? 
C11 C12 1.538(4) . ? 
C12 C13 1.514(4) . ? 
C12 H12 0.9800 . ? 
C13 C14 1.331(4) . ? 
C13 C17 1.494(4) . ? 
C15 C27 1.509(4) . ? 
C15 C28 1.527(5) . ? 
C15 C16 1.540(4) . ? 
C16 C17 1.520(4) . ? 
C16 H16 0.9800 . ? 
C17 H17A 0.9700 . ? 
C17 H17B 0.9700 . ? 
C18 C19 1.492(5) . ? 
C18 H18A 0.9700 . ? 
C18 H18B 0.9700 . ? 
C19 C20 1.306(5) . ? 
C19 H19 0.9300 . ? 
C20 H20A 0.9300 . ? 
C20 H20B 0.9300 . ? 
C21 C22 1.521(5) . ? 
C21 H21A 0.9700 . ? 
C21 H21B 0.9700 . ? 
C22 C23 1.198(7) . ? 
C22 H22 0.9300 . ? 
C23 H23A 0.9300 . ? 
C23 H23B 0.9300 . ? 
C24 C26 1.516(5) . ? 
C24 C25 1.528(5) . ? 
C25 H25A 0.9600 . ? 
C25 H25B 0.9600 . ? 
C25 H25C 0.9600 . ? 
C26 H26A 0.9600 . ? 
C26 H26B 0.9600 . ? 
C26 H26C 0.9600 . ? 
C27 H27A 0.9600 . ? 
C27 H27B 0.9600 . ? 
C27 H27C 0.9600 . ? 
C28 H28A 0.9600 . ? 
C28 H28B 0.9600 . ? 
C28 H28C 0.9600 . ? 
 
loop_ 
 _geom_angle_atom_site_label_1 
 _geom_angle_atom_site_label_2 
 _geom_angle_atom_site_label_3 
 _geom_angle 
 _geom_angle_site_symmetry_1 
 _geom_angle_site_symmetry_3 
 _geom_angle_publ_flag 
C3 O1 C4 110.0(2) . . ? 
C16 O2 HO2 109.5 . . ? 
C14 O3 C15 114.6(2) . . ? 
C8 O5 HO5 109.5 . . ? 
C24 O7 HO7 109.5 . . ? 
C11 O8 HO8 109.5 . . ? 
HOW2 OW HOW1 109(3) . . ? 
O4 C1 C2 125.4(3) . . ? 
O4 C1 C8 117.8(3) . . ? 
C2 C1 C8 116.1(3) . . ? 
C3 C2 C1 117.1(3) . . ? 
C3 C2 H2 121.5 . . ? 
C1 C2 H2 121.5 . . ? 
C2 C3 O1 124.9(3) . . ? 
C2 C3 C6 124.0(3) . . ? 
O1 C3 C6 110.9(2) . . ? 
O1 C4 C5 104.3(2) . . ? 
O1 C4 C24 109.8(2) . . ? 
C5 C4 C24 116.6(2) . . ? 
O1 C4 H4 108.6 . . ? 
C5 C4 H4 108.6 . . ? 
C24 C4 H4 108.6 . . ? 
C4 C5 C6 103.3(2) . . ? 
C4 C5 H5A 111.1 . . ? 
C6 C5 H5A 111.1 . . ? 
C4 C5 H5B 111.1 . . ? 
C6 C5 H5B 111.1 . . ? 
H5A C5 H5B 109.1 . . ? 
C3 C6 C5 100.8(2) . . ? 
C3 C6 C7 115.2(2) . . ? 
C5 C6 C7 116.2(2) . . ? 
C3 C6 C9 105.6(2) . . ? 
C5 C6 C9 110.1(2) . . ? 
C7 C6 C9 108.3(2) . . ? 
C8 C7 C12 112.8(2) . . ? 
C8 C7 C6 111.9(2) . . ? 
C12 C7 C6 108.7(2) . . ? 
C8 C7 H7 107.8 . . ? 
C12 C7 H7 107.8 . . ? 
C6 C7 H7 107.8 . . ? 
O5 C8 C1 108.4(2) . . ? 
O5 C8 C7 110.3(2) . . ? 
C1 C8 C7 113.1(2) . . ? 
O5 C8 C21 108.3(2) . . ? 
C1 C8 C21 108.1(2) . . ? 
C7 C8 C21 108.6(2) . . ? 
C14 C9 C10 101.9(2) . . ? 
C14 C9 C6 111.1(2) . . ? 
C10 C9 C6 107.8(2) . . ? 
C14 C9 H9 111.8 . . ? 
C10 C9 H9 111.8 . . ? 
C6 C9 H9 111.8 . . ? 
O6 C10 C9 124.1(3) . . ? 
O6 C10 C11 123.9(3) . . ? 
C9 C10 C11 112.0(2) . . ? 
O8 C11 C18 110.9(2) . . ? 
O8 C11 C12 107.9(2) . . ? 
C18 C11 C12 113.8(2) . . ? 
O8 C11 C10 107.9(2) . . ? 
C18 C11 C10 109.6(2) . . ? 
C12 C11 C10 106.6(2) . . ? 
C13 C12 C11 107.9(2) . . ? 
C13 C12 C7 109.0(2) . . ? 
C11 C12 C7 109.3(2) . . ? 
C13 C12 H12 110.2 . . ? 
C11 C12 H12 110.2 . . ? 
C7 C12 H12 110.2 . . ? 
C14 C13 C17 121.5(3) . . ? 
C14 C13 C12 112.5(2) . . ? 
C17 C13 C12 126.0(2) . . ? 
C13 C14 O3 127.3(2) . . ? 
C13 C14 C9 115.9(2) . . ? 
O3 C14 C9 116.7(2) . . ? 
O3 C15 C27 104.7(2) . . ? 
O3 C15 C28 107.4(2) . . ? 
C27 C15 C28 111.7(3) . . ? 
O3 C15 C16 108.6(2) . . ? 
C27 C15 C16 111.0(3) . . ? 
C28 C15 C16 113.1(3) . . ? 
O2 C16 C17 111.5(2) . . ? 
O2 C16 C15 110.8(2) . . ? 
C17 C16 C15 112.9(2) . . ? 
O2 C16 H16 107.1 . . ? 
C17 C16 H16 107.1 . . ? 
C15 C16 H16 107.1 . . ? 
C13 C17 C16 109.4(2) . . ? 
C13 C17 H17A 109.8 . . ? 
C16 C17 H17A 109.8 . . ? 
C13 C17 H17B 109.8 . . ? 
C16 C17 H17B 109.8 . . ? 
H17A C17 H17B 108.2 . . ? 
C19 C18 C11 112.1(3) . . ? 
C19 C18 H18A 109.2 . . ? 
C11 C18 H18A 109.2 . . ? 
C19 C18 H18B 109.2 . . ? 
C11 C18 H18B 109.2 . . ? 
H18A C18 H18B 107.9 . . ? 
C20 C19 C18 124.7(3) . . ? 
C20 C19 H19 117.7 . . ? 
C18 C19 H19 117.7 . . ? 
C19 C20 H20A 120.0 . . ? 
C19 C20 H20B 120.0 . . ? 
H20A C20 H20B 120.0 . . ? 
C22 C21 C8 114.7(3) . . ? 
C22 C21 H21A 108.6 . . ? 
C8 C21 H21A 108.6 . . ? 
C22 C21 H21B 108.6 . . ? 
C8 C21 H21B 108.6 . . ? 
H21A C21 H21B 107.6 . . ? 
C23 C22 C21 131.2(6) . . ? 
C23 C22 H22 114.4 . . ? 
C21 C22 H22 114.4 . . ? 
C22 C23 H23A 120.0 . . ? 
C22 C23 H23B 120.0 . . ? 
H23A C23 H23B 120.0 . . ? 
O7 C24 C26 106.2(2) . . ? 
O7 C24 C25 110.3(3) . . ? 
C26 C24 C25 111.6(3) . . ? 
O7 C24 C4 109.5(2) . . ? 
C26 C24 C4 110.8(3) . . ? 
C25 C24 C4 108.5(2) . . ? 
C24 C25 H25A 109.5 . . ? 
C24 C25 H25B 109.5 . . ? 
H25A C25 H25B 109.5 . . ? 
C24 C25 H25C 109.5 . . ? 
H25A C25 H25C 109.5 . . ? 
H25B C25 H25C 109.5 . . ? 
C24 C26 H26A 109.5 . . ? 
C24 C26 H26B 109.5 . . ? 
H26A C26 H26B 109.5 . . ? 
C24 C26 H26C 109.5 . . ? 
H26A C26 H26C 109.5 . . ? 
H26B C26 H26C 109.5 . . ? 
C15 C27 H27A 109.5 . . ? 
C15 C27 H27B 109.5 . . ? 
H27A C27 H27B 109.5 . . ? 
C15 C27 H27C 109.5 . . ? 
H27A C27 H27C 109.5 . . ? 
H27B C27 H27C 109.5 . . ? 
C15 C28 H28A 109.5 . . ? 
C15 C28 H28B 109.5 . . ? 
H28A C28 H28B 109.5 . . ? 
C15 C28 H28C 109.5 . . ? 
H28A C28 H28C 109.5 . . ? 
H28B C28 H28C 109.5 . . ? 
 
loop_ 
 _geom_torsion_atom_site_label_1 
 _geom_torsion_atom_site_label_2 
 _geom_torsion_atom_site_label_3 
 _geom_torsion_atom_site_label_4 
 _geom_torsion 
 _geom_torsion_site_symmetry_1 
 _geom_torsion_site_symmetry_2 
 _geom_torsion_site_symmetry_3 
 _geom_torsion_site_symmetry_4 
 _geom_torsion_publ_flag 
O4 C1 C2 C3 164.0(3) . . . . ? 
C8 C1 C2 C3 -25.9(4) . . . . ? 
C1 C2 C3 O1 168.3(3) . . . . ? 
C1 C2 C3 C6 -17.1(5) . . . . ? 
C4 O1 C3 C2 -175.8(3) . . . . ? 
C4 O1 C3 C6 9.0(3) . . . . ? 
C3 O1 C4 C5 12.6(3) . . . . ? 
C3 O1 C4 C24 138.2(3) . . . . ? 
O1 C4 C5 C6 -28.0(3) . . . . ? 
C24 C4 C5 C6 -149.2(2) . . . . ? 
C2 C3 C6 C5 158.7(3) . . . . ? 
O1 C3 C6 C5 -26.1(3) . . . . ? 
C2 C3 C6 C7 32.7(4) . . . . ? 
O1 C3 C6 C7 -152.0(2) . . . . ? 
C2 C3 C6 C9 -86.7(3) . . . . ? 
O1 C3 C6 C9 88.5(3) . . . . ? 
C4 C5 C6 C3 31.9(3) . . . . ? 
C4 C5 C6 C7 157.2(2) . . . . ? 
C4 C5 C6 C9 -79.2(3) . . . . ? 
C3 C6 C7 C8 -3.8(3) . . . . ? 
C5 C6 C7 C8 -121.4(2) . . . . ? 
C9 C6 C7 C8 114.1(2) . . . . ? 
C3 C6 C7 C12 -129.0(2) . . . . ? 
C5 C6 C7 C12 113.5(2) . . . . ? 
C9 C6 C7 C12 -11.0(3) . . . . ? 
O4 C1 C8 O5 -14.7(4) . . . . ? 
C2 C1 C8 O5 174.4(2) . . . . ? 
O4 C1 C8 C7 -137.3(3) . . . . ? 
C2 C1 C8 C7 51.8(3) . . . . ? 
O4 C1 C8 C21 102.5(3) . . . . ? 
C2 C1 C8 C21 -68.4(3) . . . . ? 
C12 C7 C8 O5 -32.4(3) . . . . ? 
C6 C7 C8 O5 -155.3(2) . . . . ? 
C12 C7 C8 C1 89.2(3) . . . . ? 
C6 C7 C8 C1 -33.7(3) . . . . ? 
C12 C7 C8 C21 -150.9(2) . . . . ? 
C6 C7 C8 C21 86.2(3) . . . . ? 
C3 C6 C9 C14 78.7(3) . . . . ? 
C5 C6 C9 C14 -173.3(2) . . . . ? 
C7 C6 C9 C14 -45.2(3) . . . . ? 
C3 C6 C9 C10 -170.4(2) . . . . ? 
C5 C6 C9 C10 -62.4(3) . . . . ? 
C7 C6 C9 C10 65.7(3) . . . . ? 
C14 C9 C10 O6 -115.7(3) . . . . ? 
C6 C9 C10 O6 127.3(3) . . . . ? 
C14 C9 C10 C11 64.1(3) . . . . ? 
C6 C9 C10 C11 -53.0(3) . . . . ? 
O6 C10 C11 O8 -76.2(3) . . . . ? 
C9 C10 C11 O8 104.0(2) . . . . ? 
O6 C10 C11 C18 44.6(4) . . . . ? 
C9 C10 C11 C18 -135.2(2) . . . . ? 
O6 C10 C11 C12 168.1(3) . . . . ? 
C9 C10 C11 C12 -11.6(3) . . . . ? 
O8 C11 C12 C13 -165.6(2) . . . . ? 
C18 C11 C12 C13 71.0(3) . . . . ? 
C10 C11 C12 C13 -49.9(3) . . . . ? 
O8 C11 C12 C7 -47.1(3) . . . . ? 
C18 C11 C12 C7 -170.6(2) . . . . ? 
C10 C11 C12 C7 68.5(3) . . . . ? 
C8 C7 C12 C13 -61.9(3) . . . . ? 
C6 C7 C12 C13 62.8(3) . . . . ? 
C8 C7 C12 C11 -179.7(2) . . . . ? 
C6 C7 C12 C11 -55.0(3) . . . . ? 
C11 C12 C13 C14 62.0(3) . . . . ? 
C7 C12 C13 C14 -56.6(3) . . . . ? 
C11 C12 C13 C17 -117.4(3) . . . . ? 
C7 C12 C13 C17 124.0(3) . . . . ? 
C17 C13 C14 O3 -0.1(5) . . . . ? 
C12 C13 C14 O3 -179.5(3) . . . . ? 
C17 C13 C14 C9 175.3(2) . . . . ? 
C12 C13 C14 C9 -4.1(3) . . . . ? 
C15 O3 C14 C13 16.5(4) . . . . ? 
C15 O3 C14 C9 -158.8(2) . . . . ? 
C10 C9 C14 C13 -57.2(3) . . . . ? 
C6 C9 C14 C13 57.4(3) . . . . ? 
C10 C9 C14 O3 118.7(2) . . . . ? 
C6 C9 C14 O3 -126.7(3) . . . . ? 
C14 O3 C15 C27 -162.4(3) . . . . ? 
C14 O3 C15 C28 78.8(3) . . . . ? 
C14 O3 C15 C16 -43.8(3) . . . . ? 
O3 C15 C16 O2 -175.4(2) . . . . ? 
C27 C15 C16 O2 -60.9(3) . . . . ? 
C28 C15 C16 O2 65.5(3) . . . . ? 
O3 C15 C16 C17 58.6(3) . . . . ? 
C27 C15 C16 C17 173.1(3) . . . . ? 
C28 C15 C16 C17 -60.5(3) . . . . ? 
C14 C13 C17 C16 13.7(4) . . . . ? 
C12 C13 C17 C16 -167.0(2) . . . . ? 
O2 C16 C17 C13 -168.1(2) . . . . ? 
C15 C16 C17 C13 -42.5(3) . . . . ? 
O8 C11 C18 C19 -62.1(3) . . . . ? 
C12 C11 C18 C19 59.8(4) . . . . ? 
C10 C11 C18 C19 179.0(2) . . . . ? 
C11 C18 C19 C20 -128.9(3) . . . . ? 
O5 C8 C21 C22 59.3(4) . . . . ? 
C1 C8 C21 C22 -58.0(4) . . . . ? 
C7 C8 C21 C22 179.0(3) . . . . ? 
C8 C21 C22 C23 97.7(7) . . . . ? 
O1 C4 C24 O7 -60.4(3) . . . . ? 
C5 C4 C24 O7 57.9(3) . . . . ? 
O1 C4 C24 C26 56.3(3) . . . . ? 
C5 C4 C24 C26 174.6(3) . . . . ? 
O1 C4 C24 C25 179.1(3) . . . . ? 
C5 C4 C24 C25 -62.6(3) . . . . ? 
 
loop_ 
 _geom_hbond_atom_site_label_D 
 _geom_hbond_atom_site_label_H 
 _geom_hbond_atom_site_label_A 
 _geom_hbond_distance_DH 
 _geom_hbond_distance_HA 
 _geom_hbond_distance_DA 
 _geom_hbond_angle_DHA 
 _geom_hbond_site_symmetry_A 
O2 HO2 O7  0.82 1.96 2.769(3) 169.3 2_564 
O5 HO5 O4  0.82 2.10 2.602(3) 119.5 . 
O7 HO7 OW  0.82 1.93 2.738(4) 166.5 . 
O8 HO8 O2  0.82 1.88 2.687(3) 166.5 1_655 
OW HOW1 O5  0.84(2) 2.17(3) 3.000(4) 170(6) 3_567 
OW HOW2 O4  0.84(2) 2.04(2) 2.870(4) 176(6) 1_655 
 
_diffrn_measured_fraction_theta_max    0.978 
_diffrn_reflns_theta_full              25.44 
_diffrn_measured_fraction_theta_full   0.978 
_refine_diff_density_max    0.481 
_refine_diff_density_min   -0.418 
_refine_diff_density_rms    0.051 
